# Supplementary material for: Cucurbit[7]uril host-guest and pseudorotaxane complexes with α,ω-bis(pyridinium)alkane dications
Source: Royal Society of Chemistry journal article supplement (doi:10.1039/b910322h), 2009-01-01
Supplement: b910322h.pdf [file b910322h.pdf]

Electronic Supplementary Information

## Cucurbit[7]uril host-guest complexes and pseudorotaxanes with $\alpha,\omega$ -bis(pyridinium)alkane dications

Ian W. Wyman and Donal H. Macartney\*

Department of Chemistry, Queen's University, 90 Bader Lane, Kingston, ON K7L 3N6, Canada.

Fax: +1 613 533 6669; Tel: +1 613 533 2617; E-mail: donal@chem.queensu.ca

| Contents                                                                                                                                                                                                                                                                                                    | Page |
|-------------------------------------------------------------------------------------------------------------------------------------------------------------------------------------------------------------------------------------------------------------------------------------------------------------|------|
| <b>Figure S1.</b> $^1\text{H}$ NMR spectra of $\text{BPE}^{2+}$ ( $0.98 \times 10^{-3} \text{ mol dm}^{-3}$ ) in the presence of (a) 0.00 equiv, (b) 0.23 equiv, (c) 0.74 equiv, (d) 1.26 equiv, and (e) 6.60 equiv of CB[7] in $\text{D}_2\text{O}$ .                                                      | S2   |
| <b>Figure S2.</b> $^1\text{H}$ NMR spectra of $\text{BAPE}^{2+}$ ( $1.08 \times 10^{-3} \text{ mol dm}^{-3}$ ) in the presence of (a) 0.00 equiv, (b) 0.73 equiv, (c) 1.14 equiv, (d) 1.86 equiv, and (e) 2.34 equiv of CB[7] in $\text{D}_2\text{O}$ .                                                     | S3   |
| <b>Figure S3.</b> $^1\text{H}$ NMR spectra of $\text{BBPE}^{2+}$ ( $1.00 \times 10^{-3} \text{ mol dm}^{-3}$ ) in the presence of (a) 0.00 equiv, (b) 0.30 equiv, (c) 0.73 equiv, (d) 1.57 equiv, and (e) 2.19 equiv of CB[7] in $\text{D}_2\text{O}$ .                                                     | S4   |
| <b>Figure S4.</b> $^1\text{H}$ NMR spectra of $\text{BPH}^{2+}$ ( $1.13 \times 10^{-3} \text{ mol dm}^{-3}$ ) in the presence of (a) 0.00 equiv, (b) 0.49 equiv, (c) 1.06 equiv, (d) 1.58 equiv, and (e) 5.94 equiv of CB[7] in $\text{D}_2\text{O}$ .                                                      | S5   |
| <b>Figure S5.</b> $^1\text{H}$ NMR spectra of $\text{B2PH}^{2+}$ ( $1.16 \times 10^{-3} \text{ mol dm}^{-3}$ ) in the presence of (a) 0.00 equiv, (b) 0.67 equiv, (c) 0.95 equiv, (d) 1.62 equiv, and (e) 7.45 equiv of CB[7] in $\text{D}_2\text{O}$ .                                                     | S6   |
| <b>Figure S6.</b> $^1\text{H}$ NMR spectra of $\text{B3PH}^{2+}$ ( $1.08 \times 10^{-3} \text{ mol dm}^{-3}$ ) in the presence of (a) 0.00 equiv, (b) 0.47 equiv, (c) 0.99 equiv, (d) 1.43 equiv, and (e) 2.17 equiv of CB[7] in $\text{D}_2\text{O}$ .                                                     | S7   |
| <b>Figure S7.</b> $^1\text{H}$ NMR spectra of $\text{BAPH}^{2+}$ ( $1.13 \times 10^{-3} \text{ mol dm}^{-3}$ ) in the presence of (a) 0.00 equiv, (b) 0.54 equiv, (c) 1.17 equiv, (d) 2.37 equiv, and (e) 5.47 equiv of CB[7] in $\text{D}_2\text{O}$ .                                                     | S8   |
| <b>Figure S8.</b> $^1\text{H}$ NMR spectra of $\text{BBPH}^{2+}$ ( $1.00 \times 10^{-3} \text{ mol dm}^{-3}$ ) in the presence of (a) 0.00 equiv, (b) 0.70 equiv, (c) 1.14 equiv, (d) 1.80 equiv, and (e) 2.22 equiv of CB[7] in $\text{D}_2\text{O}$ .                                                     | S9   |
| <b>Figure S9.</b> $^1\text{H}$ NMR spectra of $\text{BBPX}^{2+}$ ( $0.51 \times 10^{-3} \text{ mol dm}^{-3}$ ) in the presence of (a) 0.00 equiv, (b) 0.34 equiv, (c) 0.90 equiv, (d) 1.57 equiv, and (e) 2.48 equiv of CB[7] in $\text{D}_2\text{O}$ .                                                     | S10  |
| <b>Figure S10.</b> $^1\text{H}$ NMR chemical shift titration of $\text{BPE}^{2+}$ ( $1.13 \times 10^{-3} \text{ mol dm}^{-3}$ ) with CB[7] in $\text{D}_2\text{O}$ . The solid circles are for the H3/H5 protons, while empty circles are for the H4 protons.                                               | S10  |
| <b>Figure S11.</b> Double reciprocal plot of $1/\Delta\delta$ against $1/[\text{CB}[7]]$ for the titration of $\text{BPE}^{2+}$ ( $1.13 \times 10^{-3} \text{ mol dm}^{-3}$ ) with CB[7] in $\text{D}_2\text{O}$ . The solid circles are for the H3/H5 protons, while empty circles are for the H4 protons. | S11  |
| <b>Table S1.</b> Mass spectral peaks for the 1:1 and 2:1 CB[7] host-guest complexes in aqueous solution (calculated values given in parentheses).                                                                                                                                                           | S12  |

This journal is (c) The Royal Society of Chemistry 2009

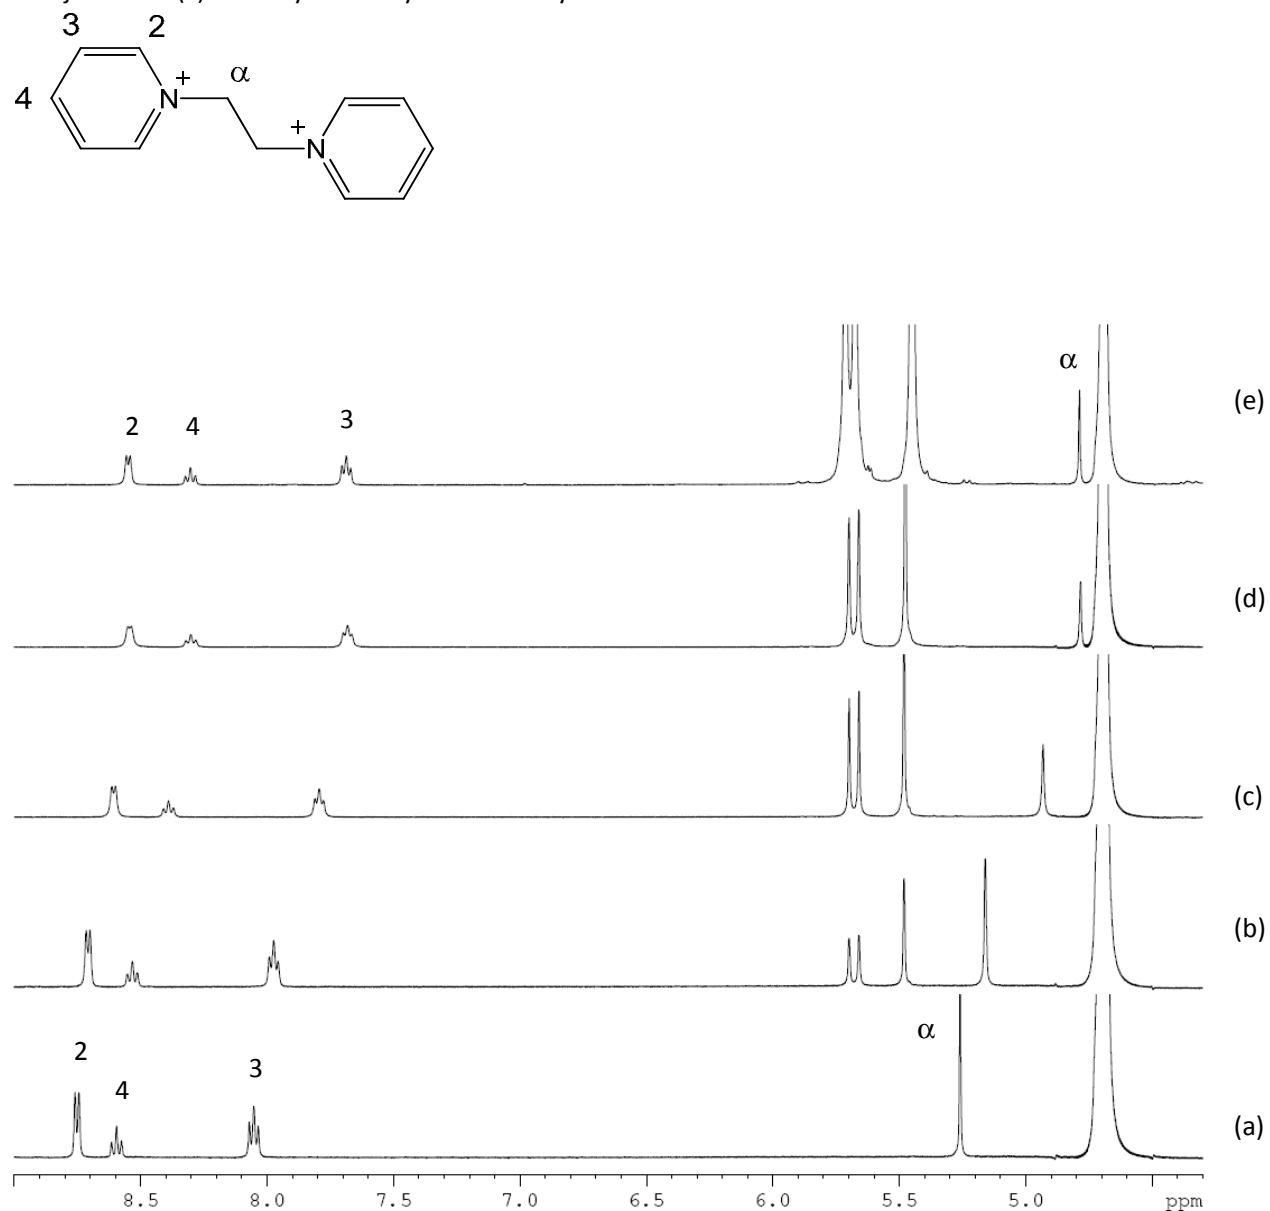

**Figure S1.** <sup>1</sup>H NMR spectra of BPE<sup>2+</sup> ( $0.98 \times 10^{-3} \text{ mol dm}^{-3}$ ) in the presence of (a) 0.00 equiv, (b) 0.23 equiv, (c) 0.74 equiv, (d) 1.26 equiv, and (e) 6.60 equiv of CB[7] in D<sub>2</sub>O.

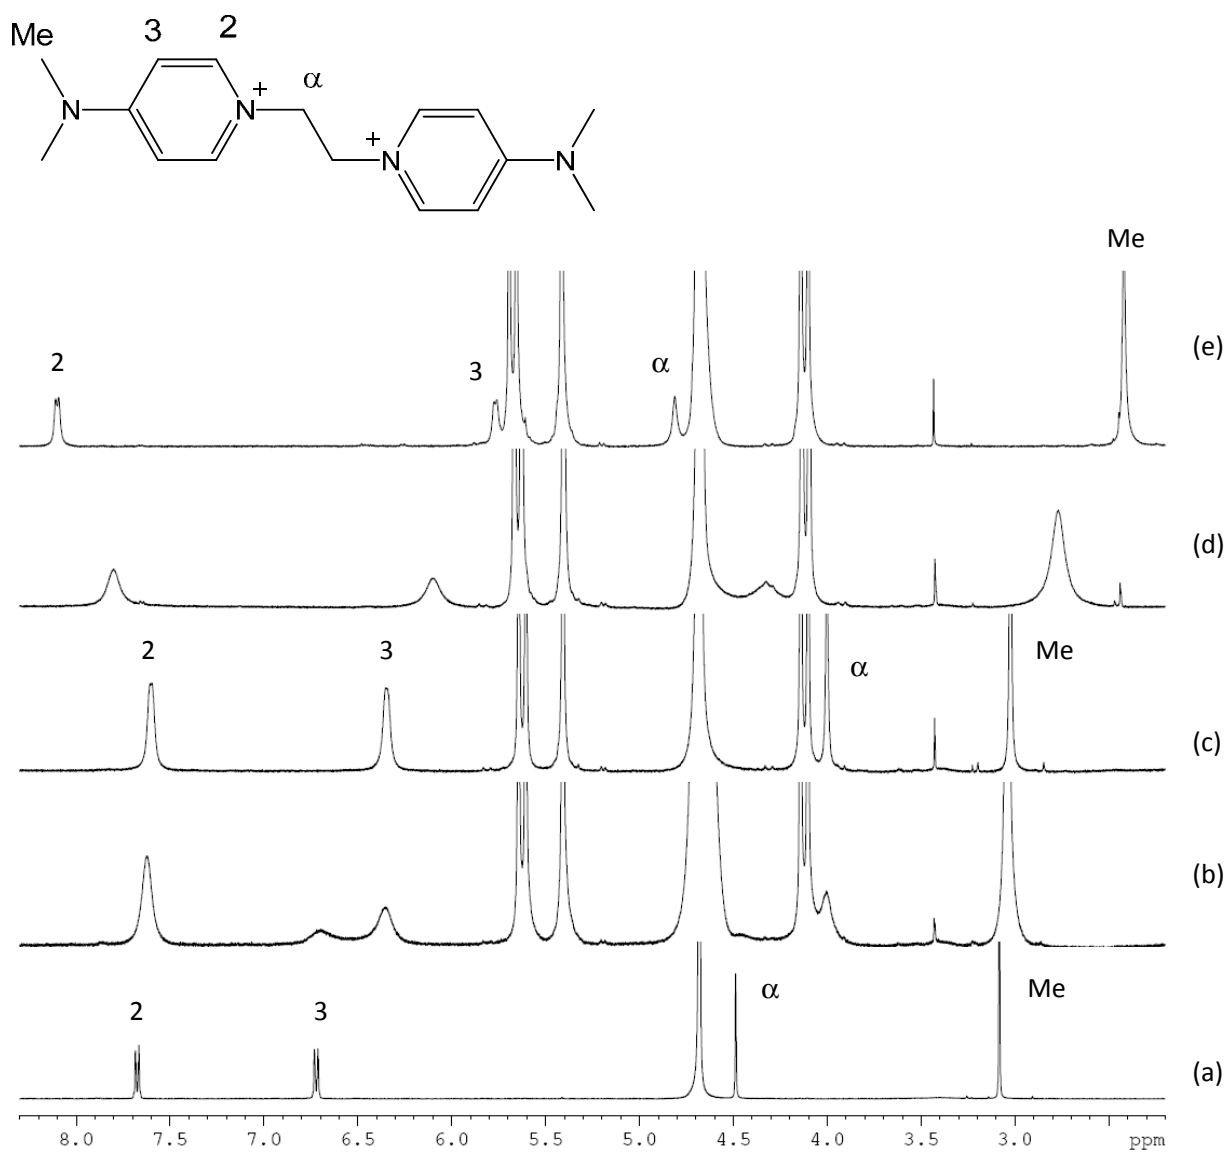

**Figure S2.** <sup>1</sup>H NMR spectra of BAPE<sup>2+</sup> ( $1.08 \times 10^{-3} \text{ mol dm}^{-3}$ ) in the presence of (a) 0.00 equiv, (b) 0.73 equiv, (c) 1.14 equiv, (d) 1.86 equiv, and (e) 2.34 equiv of CB[7] in D<sub>2</sub>O.

This journal is (c) The Royal Society of Chemistry 2009

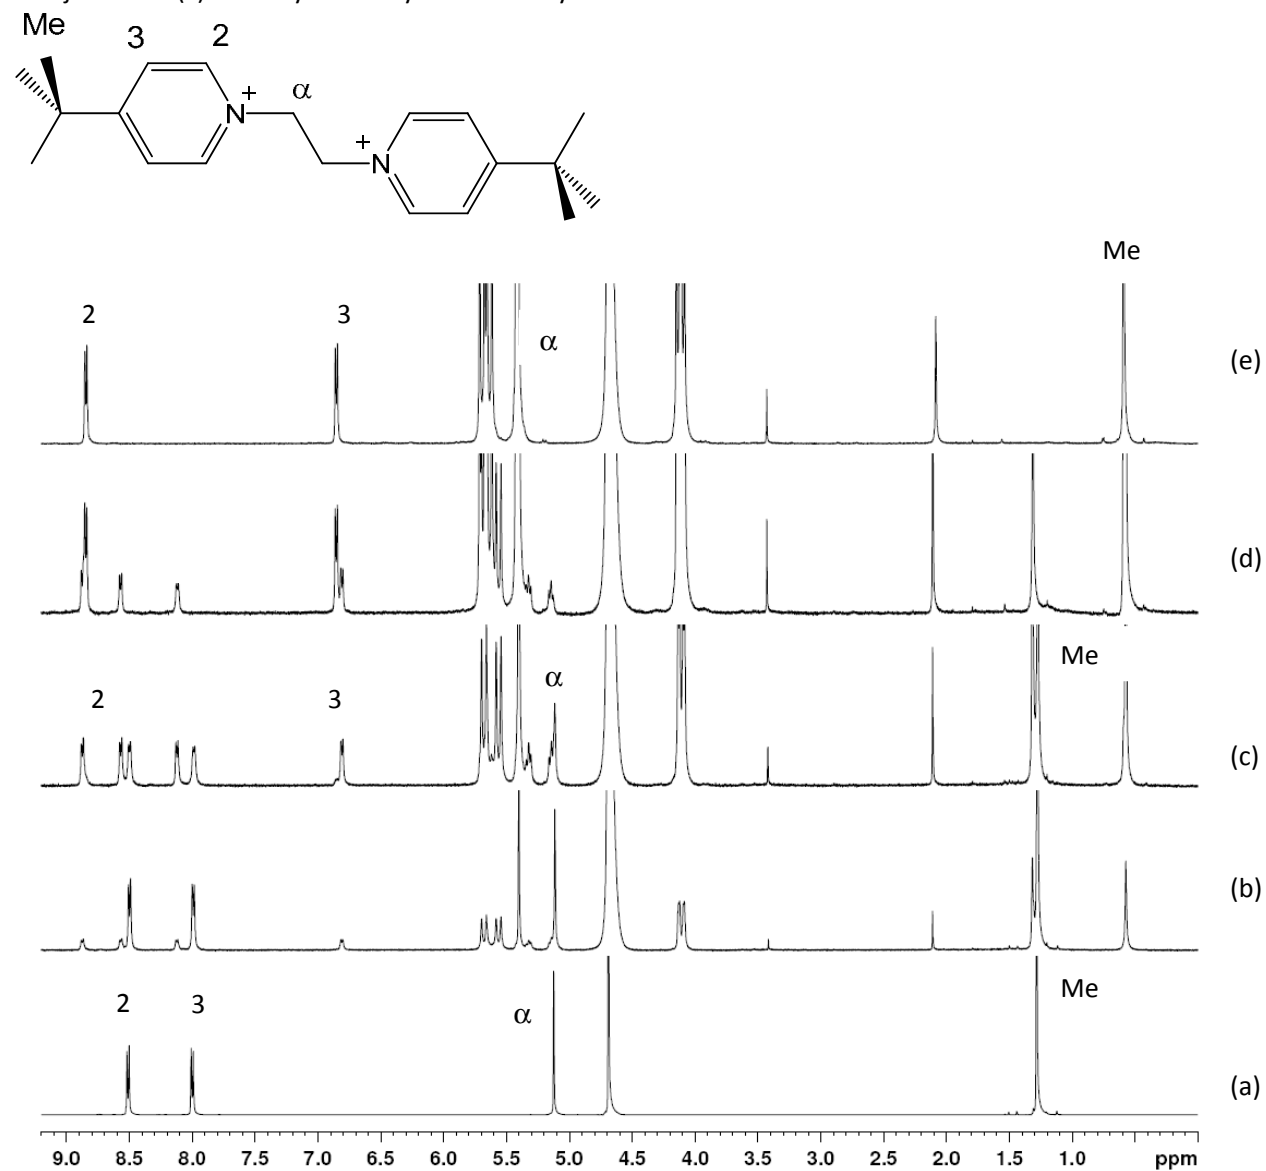

**Figure S3.** <sup>1</sup>H NMR spectra of BBPE<sup>2+</sup> ( $1.00 \times 10^{-3} \text{ mol dm}^{-3}$ ) in the presence of (a) 0.00 equiv, (b) 0.30 equiv, (c) 0.73 equiv, (d) 1.57 equiv, and (e) 2.19 equiv of CB[7] in D<sub>2</sub>O.

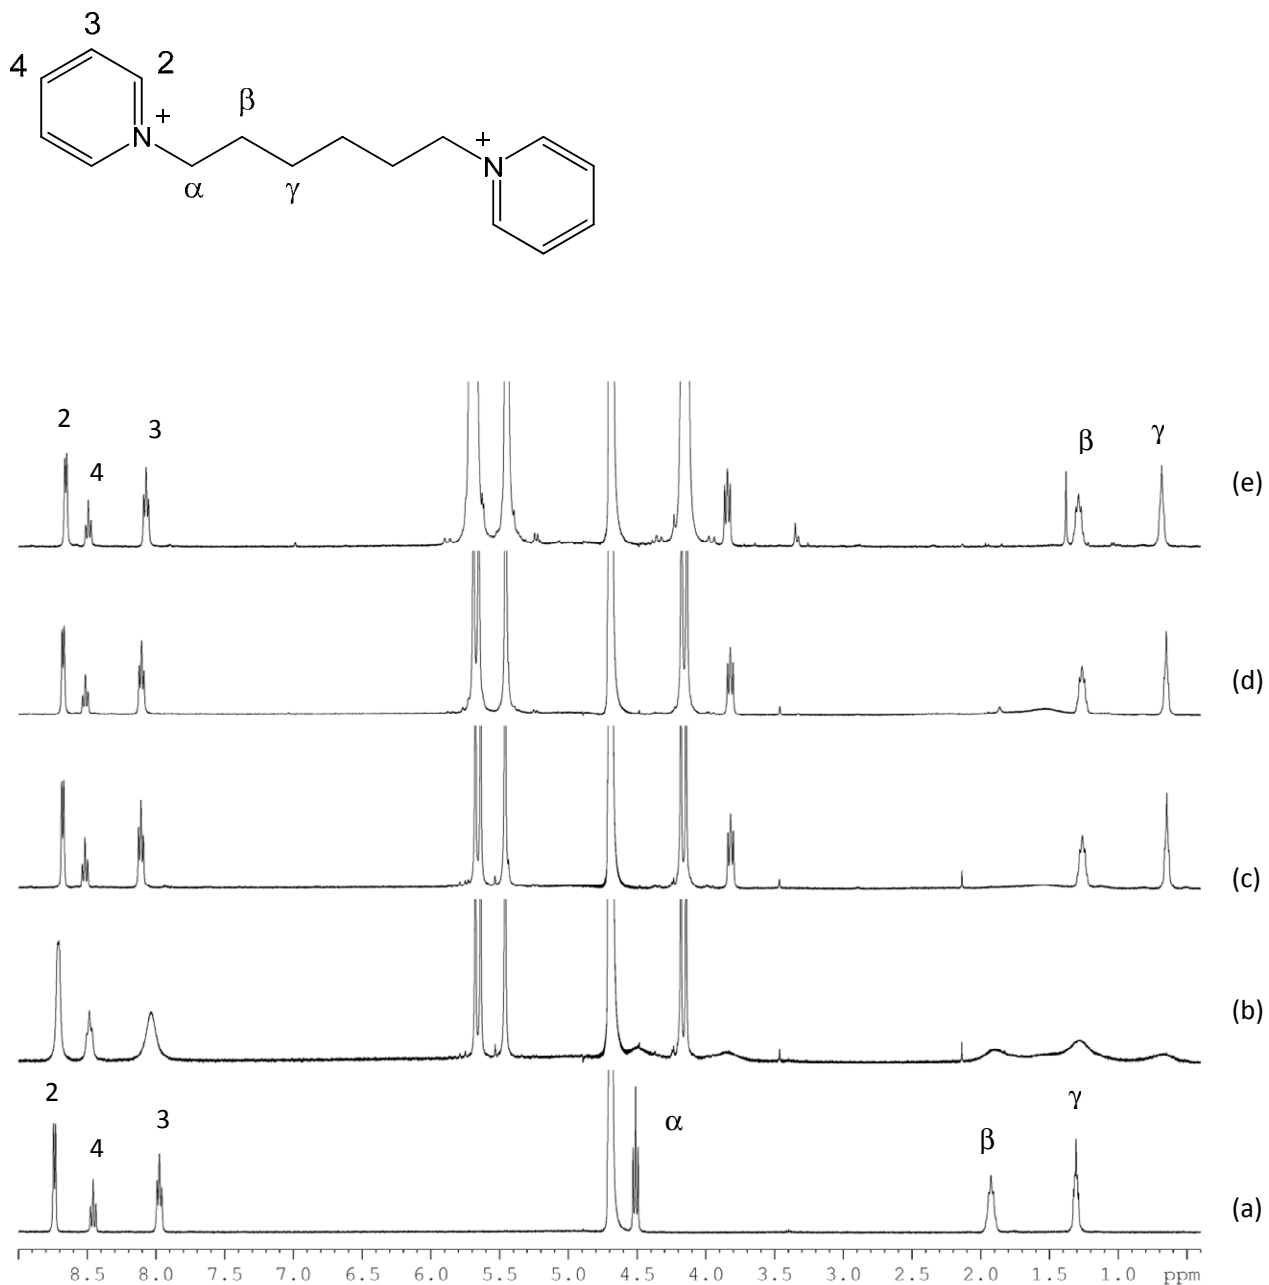

**Figure S4.** <sup>1</sup>H NMR spectra of BPH<sup>2+</sup> ( $1.13 \times 10^{-3} \text{ mol dm}^{-3}$ ) in the presence of (a) 0.00 equiv, (b) 0.49 equiv, (c) 1.06 equiv, (d) 1.58 equiv, and (e) 5.94 equiv of CB[7] in D<sub>2</sub>O.

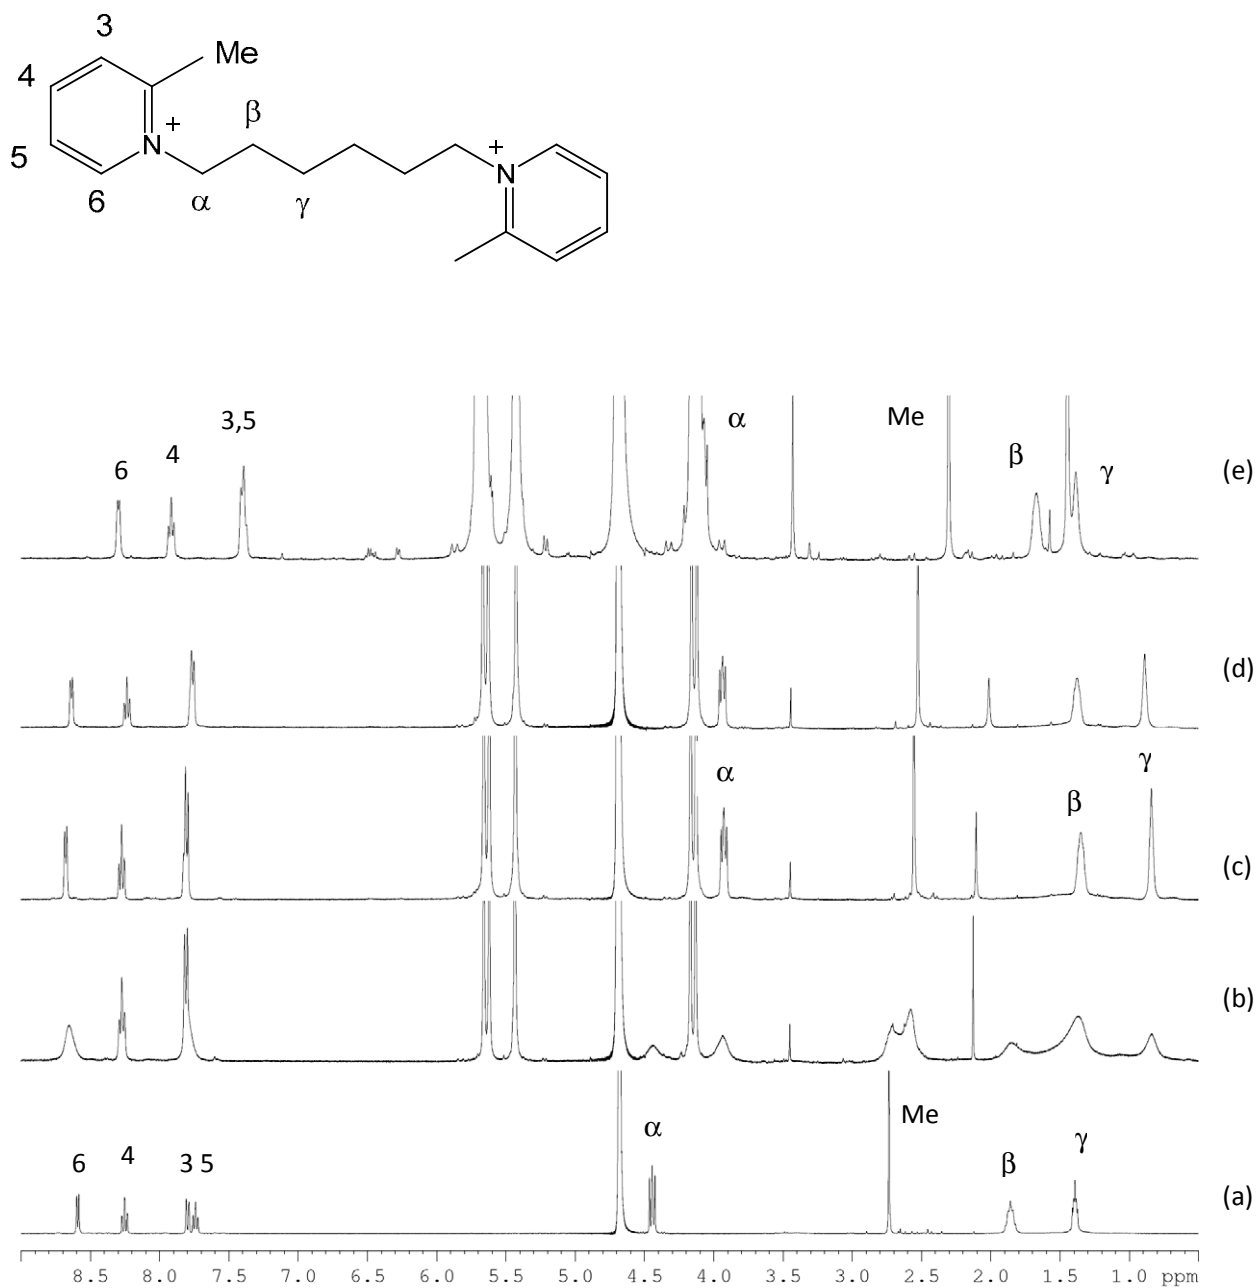

**Figure S5.** <sup>1</sup>H NMR spectra of B2PH<sup>2+</sup> ( $1.16 \times 10^{-3} \text{ mol dm}^{-3}$ ) in the presence of (a) 0.00 equiv, (b) 0.67 equiv, (c) 0.95 equiv, (d) 1.62 equiv, and (e) 7.45 equiv of CB[7] in D<sub>2</sub>O.

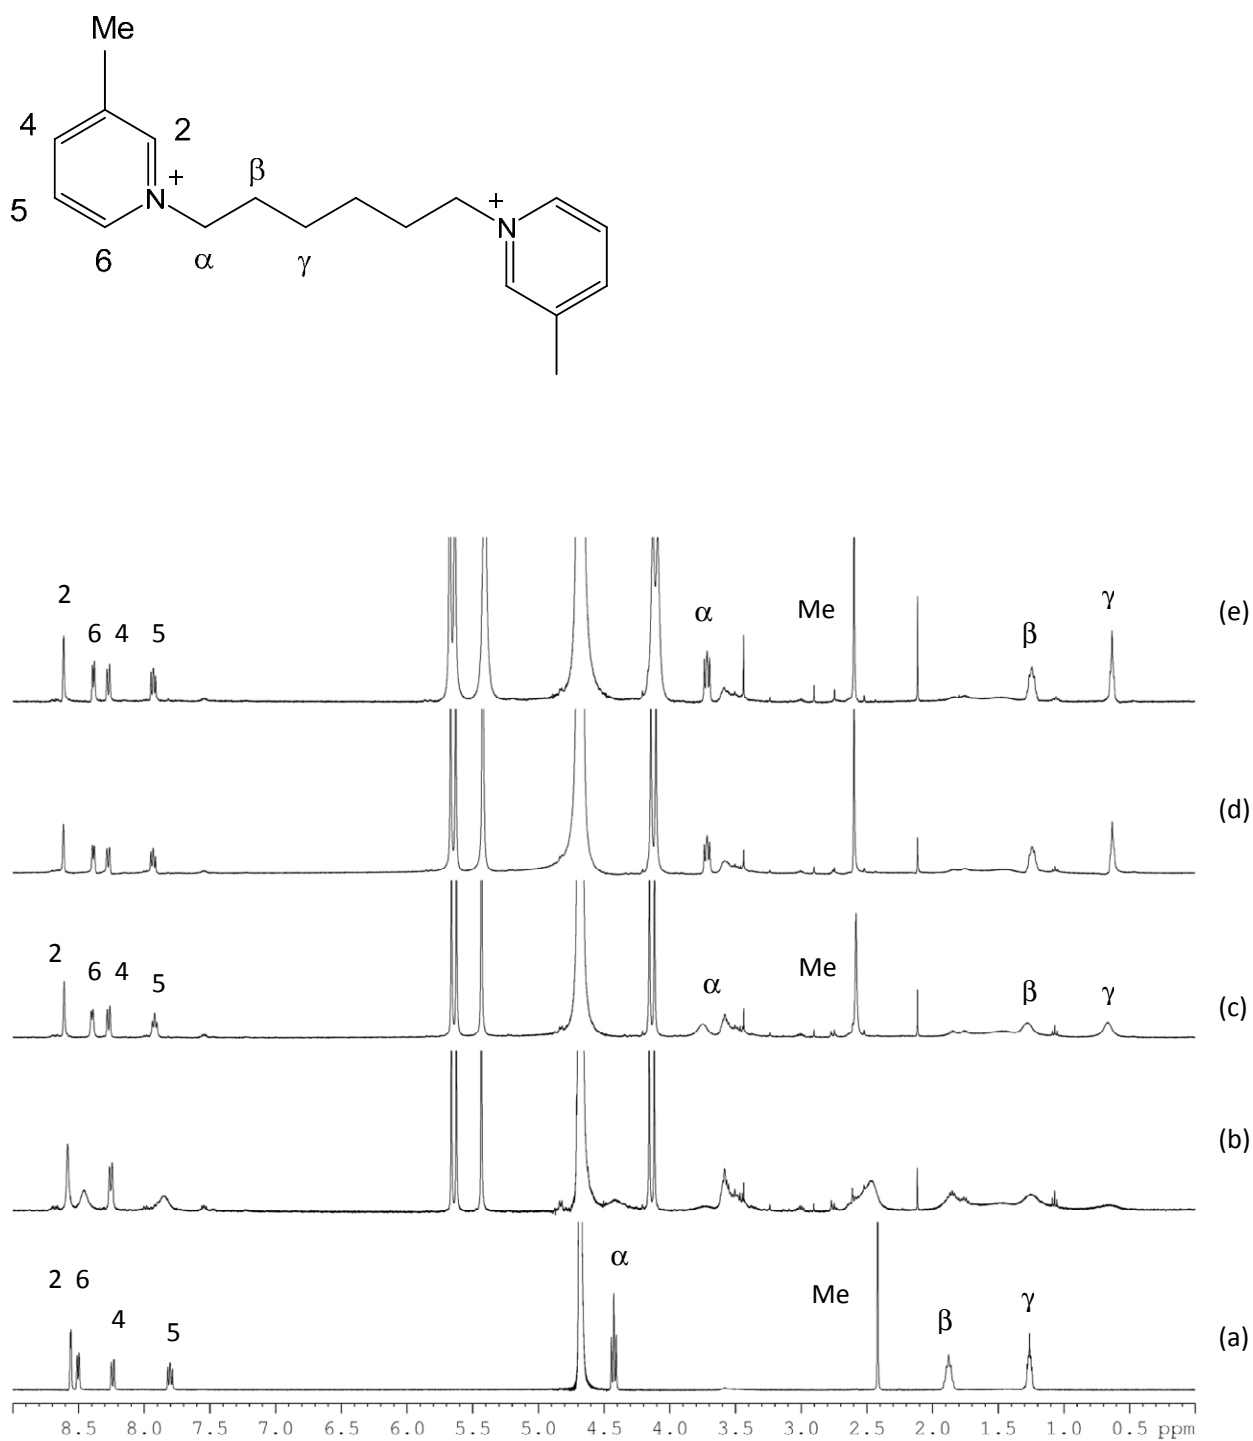

**Figure S6.** <sup>1</sup>H NMR spectra of B3PH<sup>2+</sup> ( $1.08 \times 10^{-3} \text{ mol dm}^{-3}$ ) in the presence of (a) 0.00 equiv, (b) 0.47 equiv, (c) 0.99 equiv, (d) 1.43 equiv, and (e) 2.17 equiv of CB[7] in D<sub>2</sub>O.

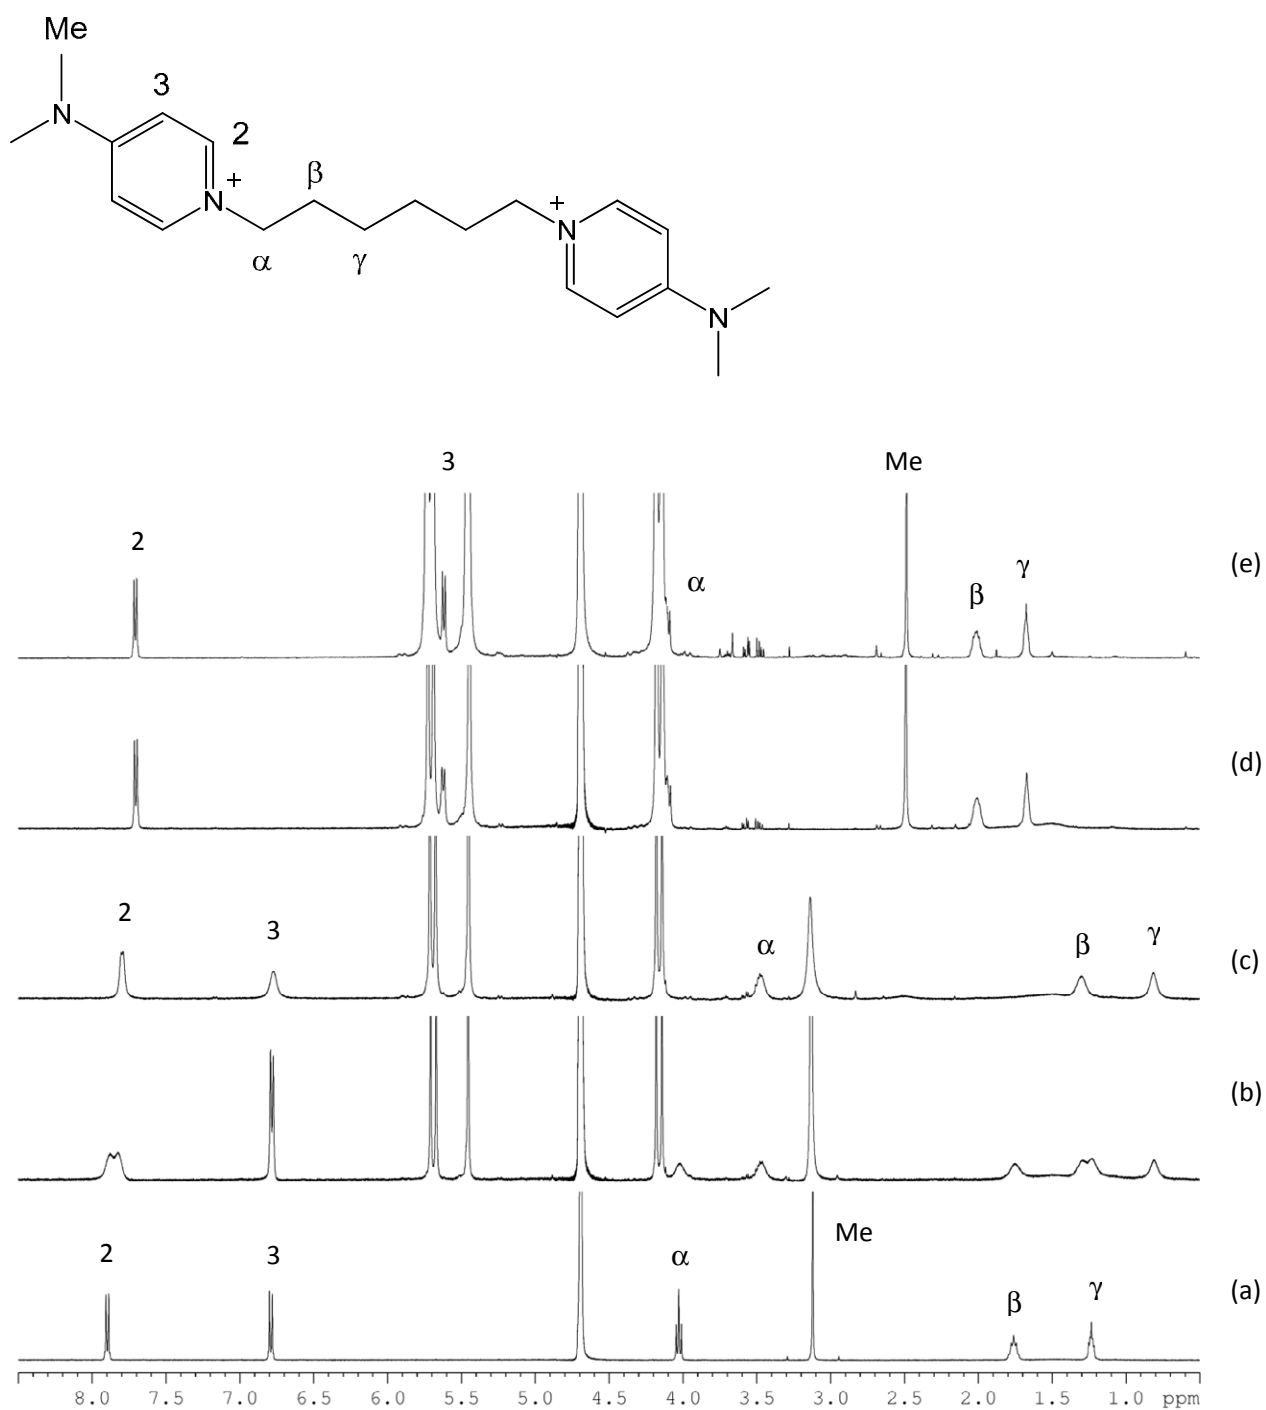

**Figure S7.** <sup>1</sup>H NMR spectra of BAPH<sup>2+</sup> ( $1.13 \times 10^{-3} \text{ mol dm}^{-3}$ ) in the presence of (a) 0.00 equiv, (b) 0.54 equiv, (c) 1.17 equiv, (d) 2.37 equiv, and (e) 5.47 equiv of CB[7] in D<sub>2</sub>O.



This journal is (c) The Royal Society of Chemistry 2009

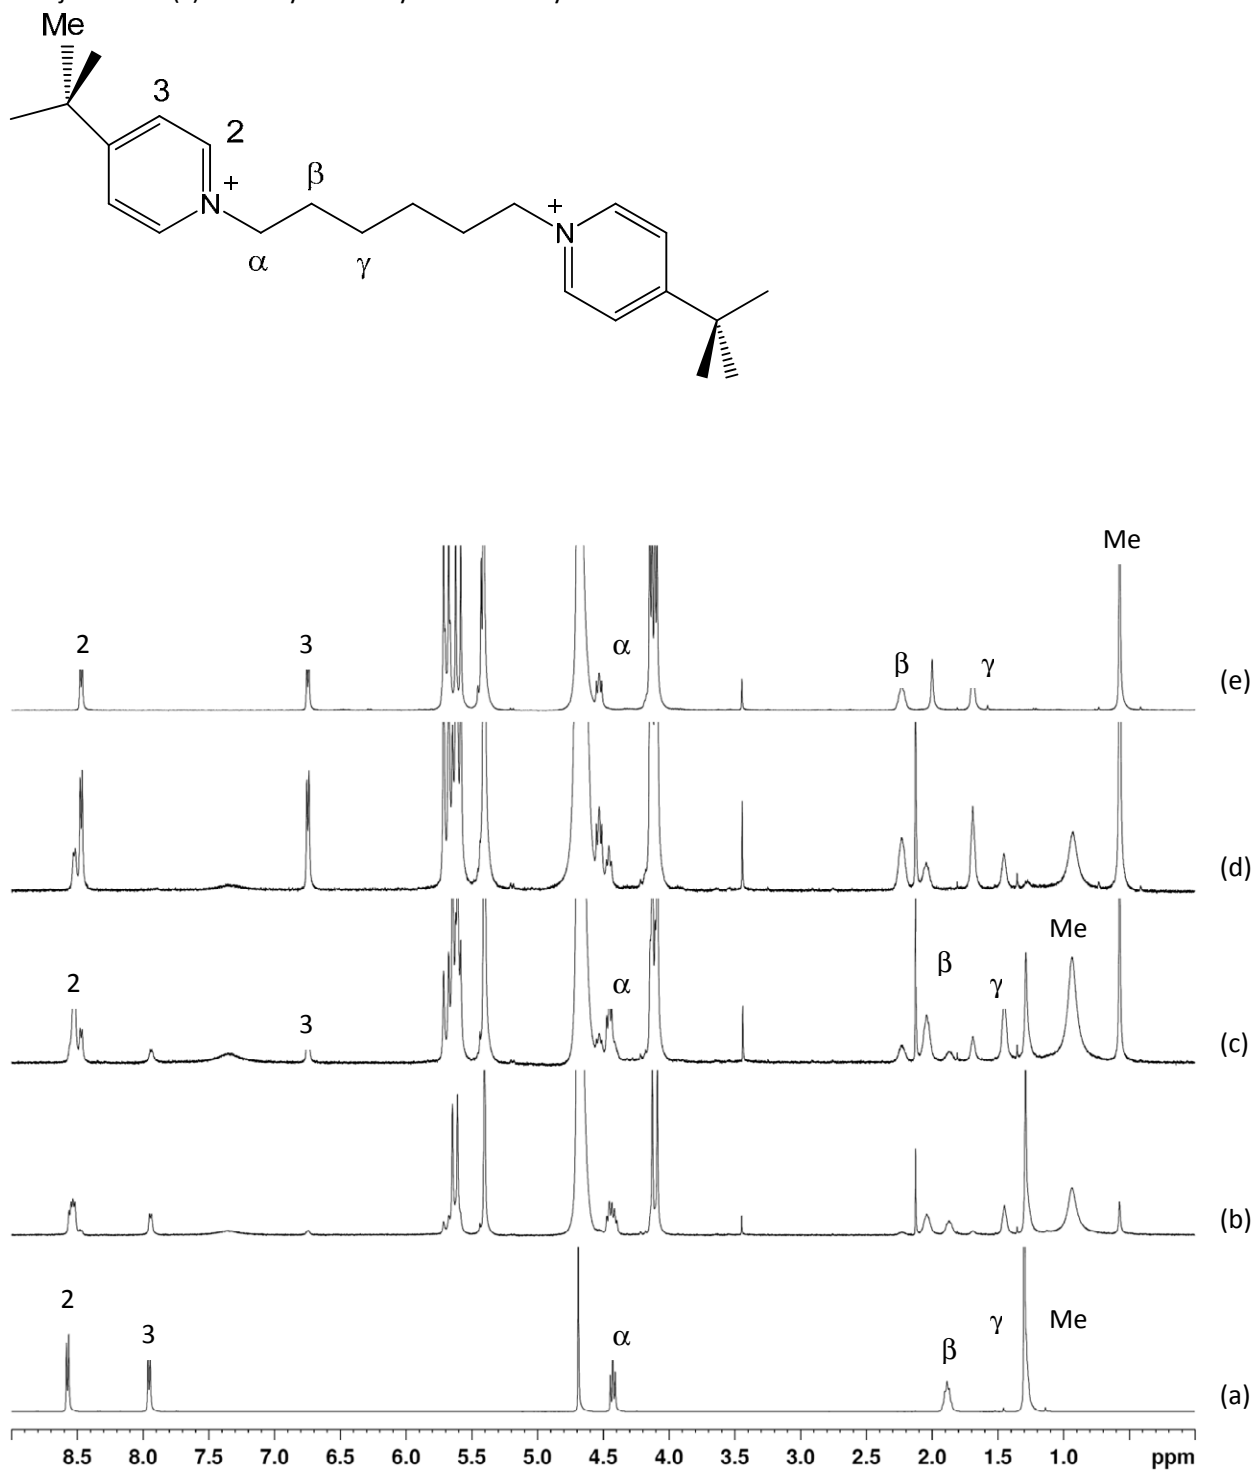

**Figure S8.** <sup>1</sup>H NMR spectra of BBPH<sup>2+</sup> ( $1.00 \times 10^{-3} \text{ mol dm}^{-3}$ ) in the presence of (a) 0.00 equiv, (b) 0.70 equiv, (c) 1.14 equiv, (d) 1.80 equiv, and (e) 2.22 equiv of CB[7] in D<sub>2</sub>O.

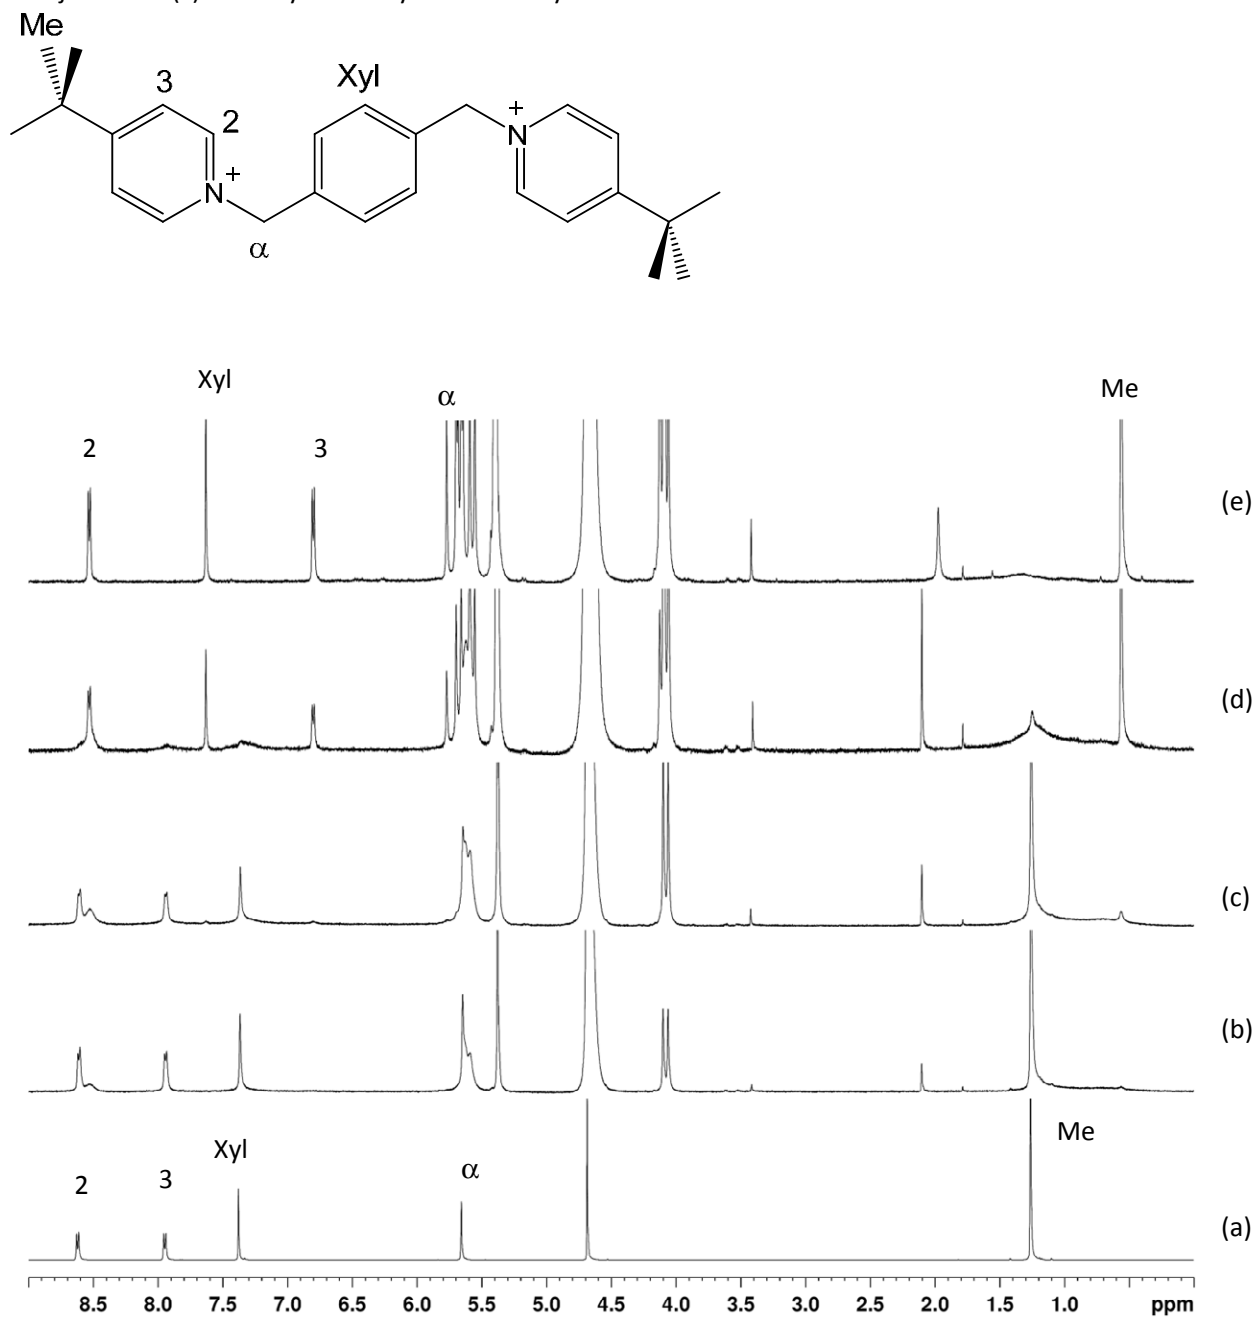

**Figure S9.** <sup>1</sup>H NMR spectra of BBPX<sup>2+</sup> ( $0.51 \times 10^{-3} \text{ mol dm}^{-3}$ ) in the presence of (a) 0.00 equiv, (b) 0.34 equiv, (c) 0.90 equiv, (d) 1.57 equiv, and (e) 2.48 equiv of CB[7] in D<sub>2</sub>O.

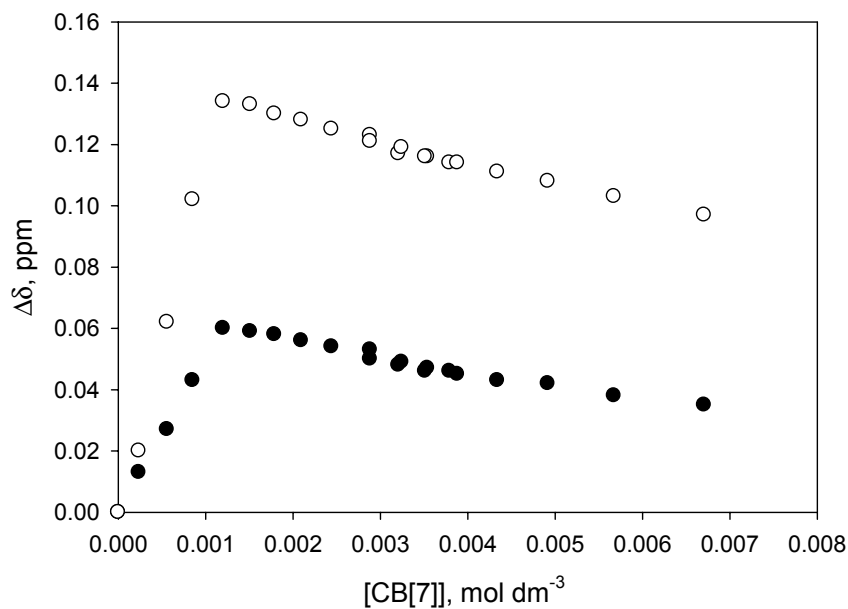

**Figure S10.**  $^1\text{H}$  NMR chemical shift titration of  $\text{BPH}^{2+}$  ( $1.13 \times 10^{-3} \text{ mol dm}^{-3}$ ) with CB[7] in  $\text{D}_2\text{O}$ . The solid circles are for the H3/H5 protons, while empty circles are for the H4 protons

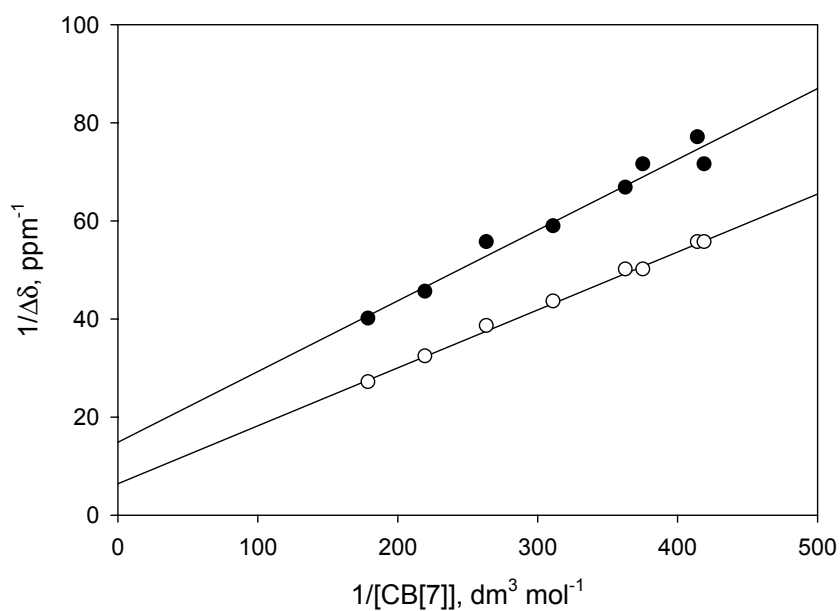

**Figure S11.** Double reciprocal plot of  $1/\Delta\delta$  against  $1/[\text{CB}[7]]$  for the titration of  $\text{BPH}^{2+}$  ( $1.13 \times 10^{-3} \text{ mol dm}^{-3}$ ) with CB[7] in  $\text{D}_2\text{O}$ . The solid circles are for the H3/H5 protons, while empty circles are for the H4 protons

**Table S1.** Mass spectral peaks for the 1:1 and 2:1 CB[7] host-guest complexes in aqueous solution (calculated values given in parentheses).

| Guest              | $[M \cdot \text{CB}[7] - 2\text{Br}]^{2+}$                                                              | $[M \cdot 2\text{CB}[7] - 2\text{Br}]^{2+}$                                                                 |
|--------------------|---------------------------------------------------------------------------------------------------------|-------------------------------------------------------------------------------------------------------------|
| BPE <sup>2+</sup>  | 674.2286 (674.2291 for C <sub>54</sub> H <sub>56</sub> N <sub>30</sub> O <sub>14</sub> <sup>2+</sup> )  | not observed                                                                                                |
| BAPE <sup>2+</sup> | 717.2748 (717.2723 for C <sub>58</sub> H <sub>66</sub> N <sub>32</sub> O <sub>14</sub> <sup>2+</sup> )  | 1298.4761 (1298.4431 for C <sub>104</sub> H <sub>116</sub> N <sub>60</sub> O <sub>28</sub> <sup>2+</sup> )  |
| BBPE <sup>2+</sup> | 730.2947 (730.2927 for C <sub>62</sub> H <sub>72</sub> N <sub>30</sub> O <sub>14</sub> <sup>2+</sup> )  | 1311.4967 (1311.4635 for C <sub>104</sub> H <sub>114</sub> N <sub>58</sub> O <sub>28</sub> <sup>2+</sup> )* |
| BPH <sup>2+</sup>  | 702.2599 (702.2603 for C <sub>58</sub> H <sub>64</sub> N <sub>30</sub> O <sub>14</sub> <sup>2+</sup> )  | 1283.4428 (1283.4321 for C <sub>100</sub> H <sub>106</sub> N <sub>58</sub> O <sub>28</sub> <sup>2+</sup> )  |
| B2PH <sup>2+</sup> | 716.40959 (716.2760 for C <sub>60</sub> H <sub>68</sub> N <sub>30</sub> O <sub>14</sub> <sup>2+</sup> ) | 1298.2939 (1297.4478 for C <sub>102</sub> H <sub>110</sub> N <sub>58</sub> O <sub>28</sub> <sup>2+</sup> )  |
| B3PH <sup>2+</sup> | 716.2784 (716.2760 for C <sub>60</sub> H <sub>68</sub> N <sub>30</sub> O <sub>14</sub> <sup>2+</sup> )  | 1297.4906 (1297.4478 for C <sub>102</sub> H <sub>110</sub> N <sub>58</sub> O <sub>28</sub> <sup>2+</sup> )  |
| BAPH <sup>2+</sup> | 745.3032 (745.3025 for C <sub>62</sub> H <sub>74</sub> N <sub>32</sub> O <sub>14</sub> <sup>2+</sup> )  | 1326.5051 (1326.4743 for C <sub>104</sub> H <sub>116</sub> N <sub>60</sub> O <sub>28</sub> <sup>2+</sup> )  |
| BBPH <sup>2+</sup> | 758.3227 (758.3229 for C <sub>66</sub> H <sub>80</sub> N <sub>30</sub> O <sub>14</sub> <sup>2+</sup> )  | 1339.5195 (1139.4947 for C <sub>108</sub> H <sub>122</sub> N <sub>58</sub> O <sub>28</sub> <sup>2+</sup> )  |
| BBPX <sup>2+</sup> | 768.3064 (768.3131 for C <sub>68</sub> H <sub>76</sub> N <sub>30</sub> O <sub>14</sub> <sup>2+</sup> )  | 1349.5275 (1349.4792 for C <sub>110</sub> H <sub>118</sub> N <sub>58</sub> O <sub>28</sub> <sup>2+</sup> )  |

\*881.9857 (881.9721 for  $[M \cdot 2\text{CB}[7] - 2\text{Br} + \text{Na}]^{3+}$ )
